# Supplementary material for: Association of elevated plasma CCL5 levels with high risk for tic disorders in children
Source: Front Pediatr. 2023 Apr 5;11:1126839. doi: 10.3389/fped.2023.1126839 (PMC10113459; doi:10.3389/fped.2023.1126839)
Supplement: Supplementary file 1 [file Table1.xlsx]

## Sheet:  profile 105 cytokines
Coordinate	Analyte/control
A1,A2	Reference Spots
A3,A4	Acrp30
A5,A6	ApoA1
A7,A8	Angiogenin
A9,A10	Angiopoietin-1
A11,A12	Angiopoietin-2
B3,B4	CD40 ligand
B5,B6	Chitinase 3-like 1
B7,B8	Complement Factor D
B9,B10	C-Reactive Protein
B11,B12	Cripto-1
C3,C4	ENA-78
C5,C6	Endoglin
C7,C8	Fas Ligand
C9,C10	FGF basic
C11,C12	FGF-7
D1,D2	GROα
D3,D4	Growth Hormone
D5,D6	HGF
D7,D8	ICAM-1
D9,D10	IFN-γ
D11,D12	IGFBP-2
E1,E2	IL-4
E3,E4	IL-5
E5,E6	IL-6
E7,E8	IL-8
E9,E10	IL-10
E11,E12	IL-11
F1,F2	IL-19
F3,F4	IL-22
F5,F6	IL-23
F7,F8	IL-24
F9,F10	IL-27
F11,F12	IL-31
G1,G2	Leptin
G3,G4	LIF
G5,G6	Lipocalin-2
G7,G8	MCP-1
G9,G10	MCP-3
G11,G12	M-CSF
H1,H2	Myeloperoxidase
H3,H4	Osteopontin
H5,H6	PDGF-AA
H7,H8	PDGF-AB/BB
H9,H10	Pentraxin 3
H11,H12	PF4
I1,I2	Serpin E1
I3,I4	SHBG
I5,I6	ST2
I7,I8	TARC
I9,I10	TFF3
I11,I12	TfR
J1,J2	RS
J5,J6	Vitamin D BP
J7,J8	CD31
J9,J10	TIM-3
J11,J12	VCAM-1
A13,A14	BAFF
A15,A16	BDNF
A17,A18	Complement Component C5/C5a
A19,A20	CD14
A21,A22	CD30
A23,A24	RS
B13,B14	Cystatin C
B15,B16	Dkk-1
B17,B18	DPPIV
B19,B20	EGF
B21,B22	Emmprin
C13,C14	FGF-19
C15,C16	Flt-3 Ligand
C17,C18	G-CSF
C19,C20	GDF-15
C21,C22	GM-CSF
D13,D14	IGFBP-3
D15,D16	IL-1α
D17,D18	IL-1β
D19,D20	IL-1ra
D21,D22	IL-2
D23,D24	IL-3
E13,E14	IL-12 p70
E15,E16	IL-13
E17,E18	IL-15
E19,E20	IL-16
E21,E22	IL-17A
E23,E24	IL-18 Bpa
F13,F14	IL-32
F15,F16	IL-33
F17,F18	IL-34
F19,F20	IP-10
F21,F22	I-TAC
F23,F24	Kallikrein 3
G13,G14	MIF
G15,G16	MIG
G17,G18	MIP-1α/MIP-1β
G19,G20	MIP-3α
G21,G22	MIP-3β
G23,G24	MMP-9
H13,H14	RAGE
H15,H16	RANTES
H17,H18	RBP-4
H19,H20	Relaxin-2
H21,H22	Resistin
H23,H24	SDF-1α
I13,I14	TGF-α
I15,I16	Thrombospondin-1
I17,I18	TNF-α
I19,I20	uPAR
I21,I22	VEGF
