# Supplementary material for: Association of elevated plasma CCL5 levels with high risk for tic disorders in children
Source: Front Pediatr. 2023 Apr 5;11:1126839. doi: 10.3389/fped.2023.1126839 (PMC10113459; doi:10.3389/fped.2023.1126839)
Supplement: Supplementary file 2 [file Table2.xlsx]

## Sheet: Sheet1
Coordinate	Analyte/control	gray value		gray value		gray value		gray value
		control1	control2	TS1	TS2	CTD1	CTD2	PTD1	PTD2
A1	RS	140.177	144.066	130.967	134.526	133.7	138.486	132.186	140.7
A3	Acrp30	158.005	157.796	152.843	151.757	162.996	165.014	165.726	160.757
A5	ApoA1	114.494	117.965	117.865	116.231	127.836	128.356	125.672	126.394
A7	Angiogenin	138.613	137.496	142.202	142.117	146.474	147.197	143.644	143.501
A9	Angiopoietin-1	26.1454	25.0802	25.8203	25.5372	35.8604	35.7348	37.6227	34.9068
A11	Angiopoietin-2	32.9063	32.0618	30.213	29.5981	48.0889	46.0971	46.7275	46.3502
B3	CD40 ligand	60.8164	53.6039	58.2217	61.0198	57.4942	58.3947	62.0169	62.5942
B5	Chitinase 3-like 1	53.0594	52.0971	46.3715	45.6135	58.4324	61.6903	55.901	55.7647
B7	Complement Factor D	85.1411	84.1604	81.2411	82.0188	85.3725	85.5396	87.6184	89.0913
B9	C-Reactive Protein	111.453	112.539	115.172	117.288	115.271	116.435	121.069	122.714
B11	Cripto-1	22.6246	20.2614	21.9918	19.8	25.3111	21.8425	25.0734	22.7638
C3	ENA-78	32.9647	32.8807	36.0135	32.6894	27.4483	27.8981	41.2517	46.3981
C5	Endoglin	85.9691	85.6768	79.9821	79.7319	79.1739	80.77	84.0768	85.3671
C7	Fas Ligand	26.4594	24.4449	23.0222	21.4039	25.1874	23.4845	26.2628	24.9536
C9	FGF basic	29.5821	28.4836	26.8981	27.9362	28.8647	28.9353	31.9845	31.029
C11	FGF-7	21.0411	21.0894	20.843	19.9961	22.0188	21.3966	22.4304	22.3227
D1	GROα	25.4899	24.4971	21.4411	19.2034	19.9667	19.8643	27.9227	27.5522
D3	Growth Hormone	57.2749	55.3039	38.1106	37.0681	41.6628	41.7672	47.643	42.9459
D5	HGF	25.0841	24.6947	20.4469	20.7367	20.8488	20.8174	24.1821	23.8903
D7	ICAM-1	56.5164	54.958	51.1155	50.9928	47.1483	48.0686	55.5585	54.3039
D9	IFN-γ	26.8787	26.7271	24.5005	25.1512	26.1048	26.2266	28.2256	28.7585
D11	IGFBP-2	80.0101	80.6092	78.9391	78.9222	78.6232	78.4135	82.2343	82.1686
E1	IL-4	35.4459	33.1614	29.7053	26.1353	30.9328	29.6729	47.2372	43.1628
E3	IL-5	19.5894	19.0889	17.1411	16.9396	18.1329	17.3232	21.1812	19.6082
E5	IL-6	23.6556	23.4217	20.9043	21.1976	21.6802	21.628	25.6024	24.0232
E7	IL-8	32.1121	33.8261	28.9995	30.4744	31.4643	32.4304	34.7367	33.8729
E9	IL-10	26.7594	26.8058	23.5246	23.5749	25.2261	24.9362	26.6744	26.615
E11	IL-11	31.1507	31.7493	29.4425	28.4874	26.0459	29.371	30.658	31.4469
F1	IL-19	23.2024	22.4845	20.7266	19.9454	21.0961	20.8324	24.3903	22.7184
F3	IL-22	34.3763	33.3179	28.4966	27.8763	34.0193	33.0614	38.3647	45.3459
F5	IL-23	21.3826	20.557	19.4734	19.4681	20.4444	20.999	21.7807	20.5937
F7	IL-24	21.9406	22.3425	20.2976	20.4802	22.4222	20.4454	21.5097	21.1092
F9	IL-27	22.3841	22.9618	20.7179	21.0043	21.0884	20.672	22.0715	21.6729
F11	IL-31	21.6725	22.0942	20.3502	19.8266	19.6841	19.657	21.1159	21.2628
G1	Leptin	32.4469	30.829	25.7101	26.1406	29.9343	28.7831	33.7444	28.8947
G3	LIF	20.0072	19.6251	19.013	18.8019	19.2802	19.2995	20.199	22.0773
G5	Lipocalin-2	67.6662	67.7478	65.5816	67.3865	62.1396	65.3826	66.8957	65.5333
G7	MCP-1	28.4594	27.7029	25.8618	25.3382	30.6411	29.0643	28.2391	26.9609
G9	MCP-3	21.858	22.7401	20.7546	20.615	21.014	20.5459	19.6478	22.1275
G11	M-CSF	26.0208	25.9198	23.6768	23.4952	22.3391	22.2729	25.7831	25.9415
H1	Myeloperoxidase	21.6251	22.9415	24.7667	27.614	26.8995	26.5256	31.5444	28.5169
H3	Osteopontin	86.615	87.1908	87.1957	86.756	85.6787	86.2773	91.8449	93.9024
H5	PDGF-AA	31.6821	31.6517	47.6121	49.2628	44.6599	44.9444	62.7357	63.8773
H7	PDGF-AB/BB	28.2749	28.2541	60.6623	61.2319	41.1729	40.4285	72.9367	72.6932
H9	Pentraxin 3	32.1884	35.1353	33.9845	35.7019	33.7411	38.6884	44.1271	45.0401
H11	PF4	103.455	104.008	113.29	113.881	105.611	106.332	116.418	117.657
I1	Serpin E1	45.787	46.1256	76.1932	79.357	75.1691	78.1232	83.4913	86.4531
I3	SHBG	90.7106	89.6174	93.8328	92.7913	100.457	97.3763	101.458	101.24
I5	ST2	28.6135	27.7271	30.3319	31.7957	36.7106	36.9396	40.8512	41.844
I7	TARC	21.0266	21.4193	26.6029	25.6522	30.2227	29.0802	36.9444	36.6319
I9	TFF3	73.3343	74.1155	74.7077	76.6464	78.3435	78.9179	84.7348	86.9618
I11	TfR	69.4174	71.4082	77.8464	77.2483	82.0841	81.2072	85.6425	82.2435
J1	RS	122.924	121.482	130.471	129.329	134.192	134.356	136.609	138.528
J5	Vitamin D BP	113.208	111.733	110.504	115.292	117.679	117.425	122.371	125.916
J7	CD31	70.3435	68.3014	80.7758	78.2072	77.2082	73.8908	97.714	95.5227
J9	TIM-3	49.2116	50.4725	55.7512	58.8362	58.6285	62.2957	70.0599	74.6053
J11	VCAM-1	101.416	104.004	114.67	115.368	120.516	123.54	125.729	126.041
A13	BAFF	41.8024	44.4106	42.9502	44.4367	52.7483	53.7623	53.8208	55.2396
A15	BDNF	29.5406	28.7855	34.7797	34.8643	43.6691	43.2024	46.8464	47.443
A17	Complement Component C5/C5a	80.7222	83.6246	79.7135	80.8517	85.0594	87.1488	99.4498	96.099
A19	CD14	74.8691	75.3063	69.8816	69.487	74.9556	74.8749	86.3377	85.5696
A21	CD30	30.6662	43.0357	28.1874	32.3193	34.1338	31.3087	37.2758	50.4879
A23	RS	185.091	197.986	131.124	135.286	134.124	138.58	163.164	156.271
B13	Cystatin C	46.6169	50.2126	48.0826	49.8845	48.7652	49.6908	53.3261	55.6498
B15	Dkk-1	25.3889	25.6488	24.2942	24.2546	28.0551	27.787	30.0604	30.4386
B17	DPPIV	112.847	115.66	114.56	118.632	115.197	118.743	137.302	138.684
B19	EGF	27.3657	24.9879	26.2792	25.2696	27.2599	23.7884	44.9164	40.814
B21	Emmprin	70.971	77.9812	66.6483	70.642	67.9072	65.6459	77.0271	84.1773
C13	FGF-19	65.1614	66.387	59.042	59.8493	64.356	64.8111	68.9952	69.8961
C15	Flt-3 Ligand	22.329	22.2106	19.6966	19.4961	22.1034	21.5903	22.8111	22.915
C17	G-CSF	24.5068	24.9995	21.0792	21.2715	23.842	24.7087	26.4928	26.9986
C19	GDF-15	35.5333	36.8314	27.5217	30.2454	32.2328	31.6246	34.087	33.8691
C21	GM-CSF	30.1957	32.2807	27.2812	29.2638	27.987	29.2879	32.0623	31.529
D13	IGFBP-3	98.0908	99.5498	93.0097	93.37	94.9082	97.5348	99.3705	99.6647
D15	IL-1α	26.414	25.1594	24.0657	22.857	27.3671	25.8961	26.5396	25.3034
D17	IL-1β	23.9135	24.1556	19.699	19.872	23.015	23.4425	22.5565	22.9357
D19	IL-1ra	24.9652	26.686	21.2725	22.0884	23.6816	24.9681	23.1758	23.5995
D21	IL-2	30.7575	32.6797	27.5874	31.087	28.8415	30.8449	28.5551	30.9266
D23	IL-3	30.3121	31.642	28.9077	30.5362	27.4126	28.6531	28.243	29.8638
E13	IL-12 p70	22.6382	23.1126	20.8671	20.6179	21.9411	22.4585	22.2271	22.3928
E15	IL-13	22.3899	21.9488	19.7271	19.242	21.5275	21.4903	21.8884	21.9377
E17	IL-15	23.2763	23.7589	19.3	20.5585	21.6744	21.9488	22.1686	22.0797
E19	IL-16	24.7353	26.2372	21.0271	21.5899	23.8256	24.9048	22.5981	23.4174
E21	IL-17A	75.3754	82.3	68.4575	74.4227	70.4087	73.3111	73.6135	80.0483
E23	IL-18 Bpa	110.087	110.514	98.629	102.848	90.7454	90.4807	100.779	101.494
F13	IL-32	23.2672	23.7527	20.6502	21.5565	22.4309	22.6821	22.8995	22.758
F15	IL-33	21.6203	21.6647	20.1145	19.7493	20.8135	20.8367	20.6391	20.6295
F17	IL-34	23.1077	24.4831	19.6145	20.0966	20.956	20.9256	22.0826	21.9986
F19	IP-10	28.8454	29.5348	23.9715	25.2647	23.8671	25.3251	26.2672	26.1478
F21	I-TAC	30.1928	32.9705	27.9	30.4739	27.7473	29.543	28.5623	31.8039
F23	Kallikrein 3	45.8802	49.1251	42.213	44.8628	36.0024	34.8256	42.9957	45.1565
G13	MIF	35.8464	36.313	48.4928	48.6266	40.0188	41.2961	60.8826	60.0039
G15	MIG	23.7242	23.7961	21.8473	21.6488	21.386	21.144	21.0396	19.0116
G17	MIP-1α/MIP-1β	20.8874	20.8116	19.4415	19.7884	18.6729	18.4928	20.087	20.7744
G19	MIP-3α	28.142	29.7101	23.0633	22.987	20.2986	21.5266	23.8536	23.7188
G21	MIP-3β	33.3217	39.4932	27.2072	34.2227	22.5826	25.0643	27.0232	33.6246
G23	MMP-9	130.384	135.867	119.215	127.582	100.219	102.881	110.091	111.361
H13	RAGE	25.1923	25.7763	25.4942	26.3111	24.5594	24.3705	29.4188	29.7164
H15	RANTES	40.942	41.4614	74.4295	75.0111	56.9618	57.7836	85.5575	84.8908
H17	RBP-4	135.446	140.061	139.445	140.661	128.65	129.521	132.385	138.421
H19	Relaxin-2	29.085	27.2976	27.7415	25.3213	18.8043	18.7396	25.2802	23.2551
H21	Resistin	40.7444	42.1894	38.47	41.1734	33.6237	35.9213	37.4918	38.2594
H23	SDF-1α	75.3101	76.1391	72.5401	75.9155	67.2865	69.9918	70.4565	73.1966
I13	TGF-α	19.7203	20.0425	22.2556	22.2647	24.0415	23.7155	29.1536	27.6952
I15	Thrombospondin-1	31.3773	32.7159	52.099	51.5841	46.3778	47.9217	57.6836	61.143
I17	TNF-α	27.0493	33.058	27.9063	36.3053	28.4005	27.2594	26.5536	27.2512
I19	uPAR	30.8681	31.9884	34.0232	32.3314	32.7362	31.0285	32.8058	32.5821
I21	VEGF	26.985	27.4459	26.357	27.3952	24.9797	25.7928	23.1686	23.7459
